# Supplementary material for: Proteome-Wide Lysine Acetylation in Cortical Astrocytes and Alterations That Occur during Infection with Brain Parasite Toxoplasma gondii
Source: PLoS One. 2015 Mar 18;10(3):e0117966. doi: 10.1371/journal.pone.0117966 (PMC4364782; doi:10.1371/journal.pone.0117966)
Supplement: S3 Table — (XLSX) [file pone.0117966.s003.xlsx]

## Sheet: Table S3
Table S3: Acetylated histone proteins
Legend: * - acetylation, # - oxidized methionine, § - published site, Blue Text - CST antibody/siRNA available.
						Raw Intensity				Average Raw Intensity		% CV		Raw Ratio	Log2 Ratio	Normalized Log2 Ratio	Raw Fold Change	Normalized Fold Change
Accession number	Protein Name	Description	site	Peptide	Average RT	Control (CS21886)	Control (CS21887)	Treated (CS21888)	Treated (CS21889)	Control	Treated	Control	Treated	Treated : Control	Treated : Control	Treated : Control	Treated : Control	Treated : Control	Species
NP_001102761	H2AX	H2A histone family, member X	§6, §10	GK*TGGK*AR	13.3464	5.47916e+06	5.49436e+06	4.03243e+06	4.18767e+06	5.48676e+06	4.11005e+06	0.19592	2.67077	0.749086	-0.416797	0.288171	-1.33496	1.22109	rat
P0C0S7	H2AZ	histone H2A.Z	§12, §14	DSGK*AK*TK	13	88600	76500	88600	86200	82550	87400	10.3646	1.94171	1.05875	0.0823651	0.787333	1.05875	1.72588	rat
P0C0S7; XP_001065720	H2AZ; H2AFV	histone H2A.Z	121; 256	ATIAGGGVIPHIHKSLIGK*	49.2588	2.10018e+06	2.17595e+06	1.17805e+06	1.8062e+06	2.13807e+06	1.49213e+06	2.50595	29.7677	0.697886	-0.518937	0.186031	-1.4329	1.13763	rat
P0C0S7; XP_001065720	H2AZ; H2AFV	histone H2A.Z	§5, §8; §140, §143	AGGK*AGK*DSGK	13.6817	633102	678112	3.59595e+06	5.63077e+06	655607	4.61336e+06	4.85466	31.1884	7.03678	2.81491	3.51988	7.03678	11.4707	rat
P0C0S7; XP_001065720	H2AZ; H2AFV	histone H2A.Z	§5, §8, §12; §140, §143, §147	AGGK*AGK*DSGK*AK	18.5371	6.33442e+07	4.91949e+07	3.53946e+07	3.26966e+07	5.62695e+07	3.40456e+07	17.7805	5.60343	0.605045	-0.724885	-0.0199176	-1.65277	-1.0139	rat
P0C0S7	H2AZ	histone H2A.Z	§5, §8, §12, §14	AGGK*AGK*DSGK*AK*TK	22.8132	2.98619e+06	2.97247e+06	1.95645e+06	1.97016e+06	2.97933e+06	1.96331e+06	0.325626	0.493509	0.658976	-0.601702	0.103266	-1.51751	1.0742	rat
P0C0S7; XP_001065720	H2AZ; H2AFV	histone H2A.Z	§8, §12; §143, §147	AGK*DSGK*AK	13.2051	1.42566e+07	1.12334e+07	1.50528e+07	1.32806e+07	1.2745e+07	1.41667e+07	16.773	8.84577	1.11155	0.152567	0.857535	1.11155	1.81194	rat
P0C0S7	H2AZ	histone H2A.Z	§8, §12, §14	AGK*DSGK*AK*TK	18.2797	7.24945e+06	6.22385e+06	6.4203e+06	7.3041e+06	6.73665e+06	6.8622e+06	10.7651	9.10694	1.01864	0.0266403	0.731608	1.01864	1.66049	rat
P84245; Q6LED0	H3 iso3; H3	histone H3.3	§10, §15; §10, §15	K*STGGK*APR	15.5489	7.85273e+08	7.7787e+08	7.71395e+08	7.29228e+08	7.81571e+08	7.50311e+08	0.669815	3.97386	0.960004	-0.0588881	0.64608	-1.04166	1.56491	rat/toxoplasma_gondii
P84245; Q6LED0	H3 iso3; H3	histone H3.3	§10, §15, §19; §10, §15, §19	K*STGGK*APRK*QLATK	24.0919	4065.16	7110.13	2.34597e+06	2.218e+06	5587.65	2.28198e+06	38.5336	3.96533	408.398	8.67383	9.3788	408.398	665.733	rat
P84245	H3 iso3	histone H3.3	§116	FQSAAIGALQEASEAYLVGLFEDTNLCAIHAK*R	100.697	2.14236e+06	1.83866e+06	1.70885e+06	1.47196e+06	1.99051e+06	1.59041e+06	10.7885	10.5323	0.798994	-0.323743	0.381225	-1.25157	1.30245	rat
P84245; Q6LED0	H3 iso3; H3	histone H3.3	§15; §15	STGGK*APR	12.3911	5.86435e+07	6.45179e+07	6.11528e+07	5.24777e+07	6.15807e+07	5.68153e+07	6.74536	10.7968	0.922615	-0.116199	0.588768	-1.08388	1.50396	rat/toxoplasma_gondii
P84245; Q6LED0	H3 iso3; H3	histone H3.3	§19, §24; §19, §24	K*QLATK*AAR	25.0917	8.52204e+09	1.15946e+10	5.1692e+09	6.38039e+09	1.00583e+10	5.7748e+09	21.6005	14.8307	0.57413	-0.800551	-0.0955832	-1.74177	-1.0685	rat
P84245; Q6LED0	H3 iso3; H3	histone H3.3	§24; §24	KQLATK*AAR	15.3471	727627000	698050000	638004000	668140000	712838500	653072000	2.93392	3.26294	0.916157	-0.126333	0.578635	-1.09152	1.49344	rat
P84245	H3 iso3	histone H3.3	§28	K*SAPSTGGVK	18.4287	673671	598199	461735	452589	635935	457162	8.39189	1.41469	0.718882	-0.476174	0.228794	-1.39105	1.17185	rat
P84245	H3 iso3	histone H3.3	§28, §37	K*SAPSTGGVK*KPHR	19.0629	1588329	1846914	3270879	3134752	1.71762e+06	3.20282e+06	10.6454	3.00537	1.86468	0.898929	1.6039	1.86468	3.03963	rat
P84245	H3 iso3	histone H3.3	§28, §38	K*SAPSTGGVKK*PHR	19.0629	1588329	1846914	3270879	3134752	1.71762e+06	3.20282e+06	10.6454	3.00537	1.86468	0.898929	1.6039	1.86468	3.03963	rat
P84245	H3 iso3	histone H3.3	§37	KSAPSTGGVK*KPHR	13.0575	182881	190866	495271	515122	186873	505196	3.02149	2.77859	2.70342	1.43479	2.13975	2.70342	4.40687	rat
P84245; Q6LED0	H3 iso3; H3	histone H3.3	§80; §80	EIAQDFK*TDLR	51.5184	1.52772e+07	1.65913e+07	1.11336e+07	1.2268e+07	1.59343e+07	1.17008e+07	5.83119	6.85531	0.734318	-0.445523	0.259445	-1.36181	1.19702	rat/toxoplasma_gondii
D3ZBN0; P15865; M0R7B4	H1B; H1C; H1D	histone cluster 1, H1b	§105; §106; §107	GTGASGSFK*LNK	35.9934	594826	597868	236000	236000	596347	236000	0.360699	0	0.395743	-1.33737	-0.632397	-2.52689	-1.55014	rat
D3ZBN0	H1B	histone cluster 1, H1b	§164	KPAAAGVK*K	12.4992	3.6327e+06	3.37927e+06	2.79986e+06	2.33646e+06	3.50598e+06	2.56816e+06	5.11136	12.7589	0.732509	-0.449083	0.255885	-1.36517	1.19407	rat
D3ZBN0	H1B	histone cluster 1, H1b	184	KATK*SPARPK	11.5741	2.00551e+06	1.84448e+06	1.36172e+06	1.35685e+06	1.925e+06	1.35928e+06	5.91515	0.253697	0.706123	-0.502009	0.202959	-1.41618	1.15106	rat
D3ZBN0	H1B	histone cluster 1, H1b	45	KATGPPVSELITK*AVSASK	65.9094	2.09089e+07	2.17803e+07	1.27814e+07	1.395e+07	2.13446e+07	1.33657e+07	2.88676	6.18274	0.626188	-0.675333	0.0296348	-1.59697	1.02075	rat
D3ZBN0; P15865; M0R7B4	H1B; H1C; H1D	histone cluster 1, H1b	84; 85; 86	LGLK*SLVSK	51.9074	2.37153e+07	2.51346e+07	1.54562e+07	1.87595e+07	2.4425e+07	1.71079e+07	4.109	13.6535	0.700426	-0.513696	0.191271	-1.4277	1.14177	rat
D3ZBN0; P15865	H1B; H1C	histone cluster 1, H1b	§89; §90	SLVSK*GTLVQTK	43.0701	6.59626e+06	5.68344e+06	7.09149e+06	6.75822e+06	6.13985e+06	6.92485e+06	10.5127	3.40311	1.12785	0.173581	0.878548	1.12785	1.83852	rat
P15865	H1C	histone H1.2	17	PAAPAAPAPAEK*TPIK	43.74	4.80786e+06	5.95616e+06	3.20214e+06	3.71175e+06	5.38201e+06	3.45694e+06	15.0868	10.4239	0.642315	-0.638648	0.0663195	-1.55687	1.04704	rat
P15865; M0R7B4	H1C; H1D	histone H1.2	§46; §47	ASGPPVSELITK*AVAASK	76.151	8.88674e+06	8.63551e+06	6.133e+06	5.57303e+06	8.76113e+06	5.85301e+06	2.02768	6.76509	0.668066	-0.581937	0.123031	-1.49686	1.08902	rat
P15865; P06349; M0R7B4	H1C; H1T; H1D	histone H1.2	75; 77; 76	ALAAAGYDVEK*NNSR	36.5293	356087	274590	216680	200775	315338	208728	18.2748	5.38796	0.661916	-0.595279	0.109688	-1.51076	1.079	rat
Q6LED0	H3	histone H3.1	§116	FQSSAVM#ALQEACEAYLVGLFEDTNLCAIHAK*R	98.6201	1.6011e+06	1.2944e+06	1.57881e+06	1.61441e+06	1.44775e+06	1.59661e+06	14.9799	1.57658	1.10282	0.141197	0.846165	1.10282	1.79772	rat
Q6LED0	H3	histone H3.1	§28	K*SAPATGGVK	18.2375	694652	701430	602050	567667	698041	584858	0.686645	4.15691	0.837857	-0.255224	0.449743	-1.19352	1.3658	rat
P0C170; P02262; NP_001104811; Q4FZT6	H2AL; H2AO; HIST2H2AB; HIST3H2A	PREDICTED: histone cluster 1, H2ao	§6, §10; §6, §10; §6, §10; §6, §10	GK*QGGK*AR	12.4441	1.85848e+07	2.1767e+07	1.87808e+07	1.47415e+07	2.01759e+07	1.67611e+07	11.1525	17.041	0.830751	-0.267512	0.437456	-1.20373	1.35421	rat
Q00729; NP_001102870; Q00715; NP_001101884; XP_001061909; NP_001104597; NP_001103111	H2B1A; H2B1K; H2B2E; HIST1H2BP; H2B1L; H2B; HIST3H2BB	histone H2B type 1-A	§110; §109; §108; §109; §109; §109; §109	LLLPGELAK*HAVSEGTK	58.6842	6.81958e+07	8.83977e+07	4.438e+07	6.5538e+07	7.82967e+07	5.4959e+07	18.2446	27.222	0.701932	-0.510597	0.194371	-1.42464	1.14423	rat
Q00729; NP_001102870; Q00715; NP_001101884; XP_001061909; NP_001104597; NP_001103111	H2B1A; H2B1K; H2B2E; HIST1H2BP; H2B1L; H2B; HIST3H2BB	histone H2B type 1-A	§118; §117; §116; 117; §117; §117; §117	HAVSEGTK*AVTK	17.7436	797400	600220	548915	660134	698810	604524	19.9522	13.0091	0.865077	-0.2091	0.495868	-1.15597	1.41017	rat/toxoplasma_gondii
Q00729; Q00715; NP_001101884; NP_001104597; NP_001103111	H2B1A; H2B2E; HIST1H2BP; H2B; HIST3H2BB	histone H2B type 1-A	§122; §120; §121; §121; §121	AVTK*YTSSK	20.8638	1.51918e+07	1.64151e+07	9.75987e+06	9.67582e+06	1.58035e+07	9.71784e+06	5.47328	0.611581	0.614918	-0.701533	0.00343447	-1.62623	1.00238	rat
Q00729; NP_001102870; Q00715; NP_001101884; XP_001061909; NP_001104597; NP_001103111	H2B1A; H2B1K; H2B2E; HIST1H2BP; H2B1L; H2B; HIST3H2BB	histone H2B type 1-A	§48; §47; §47; §47; §47; §47; §47	VLK*QVHPDTGISSK	30.2	355000	339000	299000	371000	347000	335000	3.26043	15.1975	0.965418	-0.0507746	0.654193	-1.03582	1.57374	rat
XP_001054927	Hist1h2bb	PREDICTED: histone cluster 1, H2bd-like	12, 13, 16, 17	PAPK*K*GSK*K*AISK	31.3655	627168	646482	157854	140691	636825	149272	2.14455	8.13017	0.234401	-2.09295	-1.38798	-4.2662	-2.61713	rat
XP_001054927	Hist1h2bb	PREDICTED: histone cluster 1, H2bd-like	13, 16, 17	K*GSK*K*AISK	22.4005	3.60471e+06	3.02909e+06	862015	1.2263e+06	3.3169e+06	1.04416e+06	12.2713	24.6698	0.3148	-1.66749	-0.962527	-3.17662	-1.94872	rat
XP_001054927	Hist1h2bb	PREDICTED: histone cluster 1, H2bd-like	13, 16, 17, 21	K*GSK*K*AISK*AQK	28.65	66530527	61517453	16601356	18348517	64023990	1.74749e+07	5.53664	7.06972	0.272944	-1.87333	-1.16836	-3.66376	-2.24756	rat
XP_001054927	Hist1h2bb	PREDICTED: histone cluster 1, H2bd-like	13, 16, 21	K*GSK*KAISK*AQK	22.4	20228851	21702656	3623719	3963015	2.09658e+07	3793367	4.97067	6.32468	0.180932	-2.46648	-1.76152	-5.52695	-3.39054	rat
XP_001054927	Hist1h2bb	PREDICTED: histone cluster 1, H2bd-like	16, 17, 21	KGSK*K*AISK*AQK	22.4	4837859	3943878	978539	746636	4.39087e+06	862588	14.3967	19.0103	0.19645	-2.34776	-1.6428	-5.09035	-3.1227	rat
XP_001054927	Hist1h2bb	PREDICTED: histone cluster 1, H2bd-like	17, 21	K*AISK*AQK	20.7	33216709	32452858	10241609	11379144	3.28348e+07	1.08104e+07	1.64498	7.44062	0.329236	-1.60281	-0.89784	-3.03734	-1.86327	rat
XP_001054927	Hist1h2bb	PREDICTED: histone cluster 1, H2bd-like	17, 21, 24	K*AISK*AQK*K	24.65	8604767	8407835	1320038	1450425	8506301	1.38523e+06	1.63704	6.65575	0.162848	-2.6184	-1.91344	-6.14071	-3.76706	rat
XP_001054927	Hist1h2bb	PREDICTED: histone cluster 1, H2bd-like	21	KAISK*AQK	12.3343	3.5963e+06	2.68386e+06	1.19393e+06	1.11367e+06	3.14008e+06	1.1538e+06	20.5471	4.91843	0.367444	-1.44441	-0.739437	-2.72151	-1.66952	rat
XP_001054927	Hist1h2bb	PREDICTED: histone cluster 1, H2bd-like	21, 24	AISK*AQK*K	19.5	5005315	4826350	1186990	816483	4.91583e+06	1.00174e+06	2.57428	26.1534	0.203778	-2.29493	-1.58996	-4.90731	-3.01042	rat
XP_001054927	Hist1h2bb	PREDICTED: histone cluster 1, H2bd-like	6	PEPSK*SAPAPK	20.9205	6.37731e+07	6.16053e+07	2.0999e+07	2.18287e+07	6.26892e+07	2.14139e+07	2.44523	2.7397	0.341588	-1.54967	-0.844704	-2.92751	-1.7959	rat
NP_001102870; Q9Z2Q9; XP_001061909; NP_001103111	H2B1K; H2B2F; H2B1L; HIST3H2BB	histone H2B	§12, §13, §16; §12, §13, §16; §12, §13, §16; §12, §13, §16	SAPAPK*K*GSK*K	19.9634	2.01469e+08	2.42587e+08	6.28184e+07	6.96776e+07	2.22028e+08	6.6248e+07	13.0951	7.32125	0.298377	-1.74479	-1.03983	-3.35147	-2.05598	rat
NP_001102870; Q9Z2Q9; XP_001061909; NP_001103111	H2B1K; H2B2F; H2B1L; HIST3H2BB	histone H2B	§12, §13, §16, §17; §12, §13, §16, §17; §12, §13, §16, §17; §12, §13, §16, §17	SAPAPK*K*GSK*K*AVTK	29.3873	3.52917e+07	3.2944e+07	8.01494e+06	8.07795e+06	3.41179e+07	8.04645e+06	4.86586	0.553702	0.235843	-2.0841	-1.37914	-4.24011	-2.60112	rat
NP_001102870; Q00715; NP_001101884; Q9Z2Q9; XP_001061909; NP_001103111	H2B1K; H2B2E; HIST1H2BP; H2B2F; H2B1L; HIST3H2BB	histone H2B	§13, §16, §17; §13, §16, §17; §13, §16, §17; §13, §16, §17; §13, §16, §17; §13, §16, §17	K*GSK*K*AVTK	22.5277	1047783727	1136329726	317594998	331971654	1.09206e+09	324783326	5.73335	3.13003	0.297405	-1.7495	-1.04453	-3.36242	-2.0627	rat
NP_001102870; Q00715; NP_001101884; NP_001103111	H2B1K; H2B2E; HIST1H2BP; HIST3H2BB	histone H2B	§13, §16, §17, §21; §13, §16, §17, §21; §13, §16, §17, §21; §13, §16, §17, §21	K*GSK*K*AVTK*AQK	25.9187	593808368	652793783	209710537	229221351	6.23301e+08	219465944	6.69163	6.28627	0.352103	-1.50593	-0.800964	-2.84008	-1.74227	rat
NP_001102870; Q00715; NP_001101884; NP_001103111	H2B1K; H2B2E; HIST1H2BP; HIST3H2BB	histone H2B	§13, §16, §21; §13, §16, §21; §13, §16, §21; §13, §16, §21	K*GSK*KAVTK*AQK	19.7525	166517159	183797711	39038053	38256095	175157435	38647074	6.97612	1.43071	0.220642	-2.18022	-1.47525	-4.53223	-2.78032	rat
NP_001102870; Q00715; NP_001101884; Q9Z2Q9; XP_001061909; NP_001103111	H2B1K; H2B2E; HIST1H2BP; H2B2F; H2B1L; HIST3H2BB	histone H2B	§16, §17; §16, §17; §16, §17; §16, §17; §16, §17; §16, §17	KGSK*K*AVTK	13.977	6.48255e+07	5.44963e+07	1.47268e+07	1.36345e+07	5.96609e+07	1.41807e+07	12.2423	5.44664	0.237688	-2.07286	-1.36789	-4.20719	-2.58093	rat
NP_001102870; Q00715; NP_001101884; NP_001103111	H2B1K; H2B2E; HIST1H2BP; HIST3H2BB	histone H2B	§16, §17, §21; §16, §17, §21; §16, §17, §21; §16, §17, §21	KGSK*K*AVTK*AQK	19.7525	166517159	183797711	39038053	38256095	175157435	38647074	6.97612	1.43071	0.220642	-2.18022	-1.47525	-4.53223	-2.78032	rat
NP_001102870; Q00715; NP_001101884; NP_001103111	H2B1K; H2B2E; HIST1H2BP; HIST3H2BB	histone H2B	§16, §17, §21, §24; §16, §17, §21, §24; §16, §17, §21, §24; §16, §17, §21, §24	GSK*K*AVTK*AQK*K	27.6	1205814	959315	249962	179699	1.08256e+06	214830	16.1008	23.1268	0.198446	-2.33318	-1.62821	-5.03916	-3.0913	rat
NP_001102870; Q00715; NP_001101884; NP_001103111	H2B1K; H2B2E; HIST1H2BP; HIST3H2BB	histone H2B	§17, §21; §17, §21; §17, §21; §17, §21	K*AVTK*AQK	17.4307	231518493	232215687	88020995	87290718	231867090	8.76559e+07	0.212618	0.589104	0.378044	-1.40338	-0.698408	-2.6452	-1.62271	rat
NP_001102870; Q00715; NP_001101884; NP_001103111	H2B1K; H2B2E; HIST1H2BP; HIST3H2BB	histone H2B	§17, §21, §24; §17, §21, §24; §17, §21, §24; §17, §21, §24	K*AVTK*AQK*K	21.75	108903275	101779130	21040884	23531567	1.05341e+08	2.22862e+07	4.78211	7.90254	0.211562	-2.24085	-1.53588	-4.72674	-2.89965	rat
NP_001102870; Q00715; NP_001101884; NP_001103111	H2B1K; H2B2E; HIST1H2BP; HIST3H2BB	histone H2B	§21; §21; §21; §21	AVTK*AQK	12.2475	2390960	2164840	2341960	2246750	2277900	2294355	7.01923	2.93432	1.00722	0.0103842	0.715352	1.00722	1.64188	rat
NP_001102870; Q00715; NP_001101884; NP_001103111	H2B1K; H2B2E; HIST1H2BP; HIST3H2BB	histone H2B	§21, §24; §21, §24; §21, §24; §21, §24	KAVTK*AQK*K	13.6351	8.9317e+06	9.50504e+06	3.20383e+06	3.12606e+06	9.21837e+06	3.16495e+06	4.39787	1.7374	0.343331	-1.54233	-0.837362	-2.91265	-1.78678	rat
NP_001102870; Q00715; NP_001101884	H2B1K; H2B2E; HIST1H2BP	histone H2B	§44; §44; §44	KESYSVYVYK*	41.9596	6366720	8222940	1031680	4632220	7294830	2831950	17.9928	89.9015	0.388213	-1.36508	-0.660111	-2.5759	-1.5802	rat
NP_001102870	H2B1K	histone H2B	§6	PEPAK*SAPAPK	20.9205	7.27159e+08	7.0131e+08	3.16461e+08	3.17861e+08	7.14235e+08	3.17161e+08	2.55902	0.311984	0.444057	-1.17118	-0.466215	-2.25196	-1.38148	rat
NP_001102870	H2B1K	histone H2B	§6, §12	PEPAK*SAPAPK*K	23.7486	5.2025e+06	5.40461e+06	1.26732e+06	1.59818e+06	5.30355e+06	1.43275e+06	2.69465	16.3292	0.270149	-1.88817	-1.1832	-3.70166	-2.2708	rat
NP_001102870	H2B1K	histone H2B	§6, §12, §13	PEPAK*SAPAPK*K*GSK	26.2713	7.25326e+06	7.9713e+06	1.22368e+06	969457	7.61228e+06	1.09657e+06	6.66994	16.3932	0.144053	-2.79533	-2.09037	-6.94191	-4.25856	rat
NP_001102870	H2B1K	histone H2B	§6, §12, §13, §16	PEPAK*SAPAPK*K*GSK*K	28.4837	16709184	16540270	4108617	4240441	16624727	4174529	0.718449	2.23291	0.251104	-1.99365	-1.28868	-3.98242	-2.44304	rat
XP_001061682	Hist1h2bf	PREDICTED: histone cluster 1, H2bp	6	PETAK*SAPAPK	19.3041	9.39721e+07	9.16963e+07	4.41646e+07	4.05392e+07	9.28342e+07	4.23519e+07	1.73342	6.05286	0.45621	-1.13223	-0.427262	-2.19197	-1.34468	rat
XP_001061682	Hist1h2bf	PREDICTED: histone cluster 1, H2bp	6, 12	PETAK*SAPAPK*K	22.1993	540471	403030	74759	110652	471751	92705.7	20.6011	27.3775	0.196514	-2.34729	-1.64233	-5.08869	-3.12169	rat
NP_001101884	HIST1H2BP	histone cluster 1, H2bm	12, §13, §16	SVPAPK*K*GSK*K	24.5349	989746	1.20236e+06	263433	403734	1.09605e+06	333584	13.7168	29.7399	0.304349	-1.7162	-1.01123	-3.2857	-2.01563	rat
NP_001101884	HIST1H2BP	histone cluster 1, H2bm	12, §13, §16, §17	SVPAPK*K*GSK*K*AVTK	33.107	586966	858030	91976.1	161438	722498	126707	26.5289	38.764	0.175373	-2.5115	-1.80653	-5.70212	-3.498	rat
NP_001101884	HIST1H2BP	histone cluster 1, H2bm	12, §13, §17	SVPAPK*K*GSKK*	24.5881	4.65629e+06	4.48418e+06	1.26828e+06	1.38735e+06	4.57024e+06	1.32782e+06	2.66282	6.34064	0.290536	-1.78321	-1.07824	-3.44192	-2.11146	rat
NP_001101884	HIST1H2BP	histone cluster 1, H2bm	6	PEPTK*SVPAPK	28.1744	6.43752e+07	7.07023e+07	3.00386e+07	3.20842e+07	6.75387e+07	3.10614e+07	6.6242	4.65688	0.459905	-1.12059	-0.415626	-2.17436	-1.33388	rat
NP_001099584	Hist1h2bn	histone cluster 1, H2bn	6	PDPVK*SAPAPK	25.6106	3.07317e+06	3.34223e+06	1.40397e+06	1.43498e+06	3.2077e+06	1.41948e+06	5.9312	1.54477	0.442523	-1.17618	-0.471208	-2.25977	-1.38627	rat
XP_001071516; XP_001055051; NP_001101168; XP_002725311; XP_001071856; XP_001072050; XP_001072155	Hist1h3f; Hist2h3c; Hist2h3c2; LOC100364555; LOC684762; LOC684819; LOC684841	PREDICTED: histone cluster 1, H3f	116; 116; 116; 116; 116; 165; 136	FQSSAVM#ALQEASEAYLVGLFEDTNLCAIHAK*R	100.858	7.85047e+06	7.96928e+06	8.04658e+06	7.21699e+06	7.90988e+06	7.63178e+06	1.06215	7.68638	0.964842	-0.0516353	0.653332	-1.03644	1.5728	rat
P62804	H4H4	PREDICTED: histone cluster 1, H4m	§13, §17	GLGK*GGAK*R	21.38	2.90094e+10	2.68563e+10	9.36746e+09	1.2135e+10	2.79328e+10	1.07513e+10	5.45058	18.2024	0.384897	-1.37746	-0.672489	-2.5981	-1.59382	rat/toxoplasma_gondii
P62804	H4H4	PREDICTED: histone cluster 1, H4m	§6, §9	GK*GGK*GLGK	20.4861	1.86114e+07	1.84984e+07	1.87589e+07	2.01155e+07	1.85549e+07	1.94372e+07	0.430768	4.93533	1.04755	0.0670196	0.771987	1.04755	1.70762	rat/toxoplasma_gondii
P62804	H4H4	PREDICTED: histone cluster 1, H4m	§6, §9, §13	GK*GGK*GLGK*GGAK	25.6106	1.50532e+08	1.4888e+08	1.41848e+08	1.52133e+08	1.49706e+08	1.46991e+08	0.780448	4.94791	0.98186	-0.02641	0.678558	-1.01847	1.60054	rat/toxoplasma_gondii
P62804	H4H4	PREDICTED: histone cluster 1, H4m	§6, §9, §13, §17	GK*GGK*GLGK*GGAK*R	28.9221	1.72203e+09	1.80065e+09	4.90602e+08	5.3401e+08	1.76134e+09	5.12306e+08	3.15628	5.99139	0.290862	-1.78159	-1.07663	-3.43806	-2.1091	rat/toxoplasma_gondii
P62804	H4H4	PREDICTED: histone cluster 1, H4m	§60	GVLK*VFLENVIR	93.1121	2.05974e+06	1.87588e+06	2.60914e+06	2.58258e+06	1.96781e+06	2.59586e+06	6.60665	0.723353	1.31916	0.399621	1.10459	1.31916	2.15038	rat
P62804	H4H4	PREDICTED: histone cluster 1, H4m	§78	DAVTYTEHAK*R	26.5386	5.16349e+06	4.13598e+06	2.18315e+06	2.05739e+06	4.64973e+06	2.12027e+06	15.6258	4.19401	0.455998	-1.1329	-0.427931	-2.19299	-1.3453	rat
P62804	H4H4	PREDICTED: histone cluster 1, H4m	§9, §13	GGK*GLGK*GGAK	22.2486	1.13343e+08	1.20513e+08	1.12823e+08	1.20412e+08	1.16928e+08	1.16617e+08	4.33565	4.60141	0.997344	-0.00383738	0.70113	-1.00266	1.62578	rat/toxoplasma_gondii
P62804	H4H4	PREDICTED: histone cluster 1, H4m	§9, §13, §17	GGK*GLGK*GGAK*R	26.2713	4.02383e+09	4.92072e+09	7.31178e+08	7.42858e+08	4.47227e+09	7.37018e+08	14.1807	1.12058	0.164797	-2.60124	-1.89627	-6.06807	-3.72249	rat/toxoplasma_gondii
P62804	H4H4	PREDICTED: histone cluster 1, H4m	§92	TVTAM#DVVYALK*R	65.7006	1044970	934107	428597	485167	989538	456882	7.92207	8.75522	0.461712	-1.11493	-0.409967	-2.16585	-1.32865	rat
NP_001104597	H2B	histone cluster 3, H2ba	§12, §13, §16	STPAPK*K*GSK*K	20.4207	1.46329e+06	1.42481e+06	578414	553301	1.44405e+06	565857	1.88456	3.13817	0.391854	-1.35161	-0.646643	-2.55197	-1.56552	rat
NP_001104597	H2B	histone cluster 3, H2ba	§12, §13, §16, §17	STPAPK*K*GSK*K*AITK	33.0042	3.34988e+06	3.63511e+06	707290	1.15096e+06	3.49249e+06	929124	5.7749	33.7652	0.266035	-1.91031	-1.20535	-3.75891	-2.30593	rat
NP_001104597	H2B	histone cluster 3, H2ba	§13, §16, §17	K*GSK*K*AITK	23.8077	6.68051e+07	6.89384e+07	1.85765e+07	2.15637e+07	6.78718e+07	2.00701e+07	2.22262	10.5243	0.295707	-1.75776	-1.05279	-3.38173	-2.07454	rat
NP_001104597	H2B	histone cluster 3, H2ba	§13, §16, §17, §21	K*GSK*K*AITK*AQK	29.7023	1.29338e+07	1.36874e+07	4.51132e+06	4.05257e+06	1.33106e+07	4.28194e+06	4.0035	7.57566	0.321694	-1.63624	-0.931271	-3.10854	-1.90696	rat
NP_001104597	H2B	histone cluster 3, H2ba	§13, §17, §21	K*GSKK*AITK*AQK	22.8663	3.80292e+06	3.47774e+06	1.59118e+06	1.75573e+06	3.64033e+06	1.67346e+06	6.31633	6.95297	0.4597	-1.12124	-0.416268	-2.17533	-1.33447	rat
NP_001104597	H2B	histone cluster 3, H2ba	§16, §17	KGSK*K*AITK	16.956	8.29999e+06	6.32703e+06	1.86912e+06	1.96707e+06	7.31351e+06	1.91809e+06	19.0755	3.61105	0.262267	-1.93089	-1.22592	-3.8129	-2.33905	rat
NP_001104597	H2B	histone cluster 3, H2ba	§16, §17, §21	KGSK*K*AITK*AQK	21.9887	2.79626e+06	2.16705e+06	253252	96735.3	2.48165e+06	174993	17.9284	63.2445	0.0705149	-3.82593	-3.12096	-14.1814	-8.69967	rat
NP_001104597	H2B	histone cluster 3, H2ba	§17, §21	K*AITK*AQK	21.0054	3.60606e+06	4.57421e+06	1.47166e+06	1.72083e+06	4.09013e+06	1.59624e+06	16.7373	11.0379	0.390267	-1.35747	-0.652499	-2.56235	-1.57189	rat
NP_001104597	H2B	histone cluster 3, H2ba	§17, §21, §24	K*AITK*AQK*K	24.0919	1.41764e+06	1.54303e+06	78027	101408	1.48034e+06	89717.7	5.98951	18.428	0.0606063	-4.04439	-3.33942	-16.4999	-10.122	rat
NP_001104597	H2B	histone cluster 3, H2ba	§21	KAITK*AQK	12.4992	462057	461267	223222	179005	461662	201114	0.120992	15.5466	0.43563	-1.19882	-0.493857	-2.29553	-1.4082	rat
NP_001103111	HIST3H2BB	histone cluster 3, H2bb	6	PDPSK*SAPAPK	20.36	1.69874e+06	1.67594e+06	1.0361e+06	921032	1.68734e+06	978568	0.955359	8.31495	0.579948	-0.786005	-0.0810373	-1.72429	-1.05778	rat
XP_002728547; XP_002725331	LOC100359692; LOC100365976	PREDICTED: histone cluster 1, H2bc-like	6; 6	PEPAK*SVPAPK	27.7523	118300955	118964457	49863296	51916267	118632706	5.08898e+07	0.395478	2.85258	0.428969	-1.22105	-0.516086	-2.33117	-1.43007	rat
XP_001054684	LOC679840	PREDICTED: histone H4 replacement-like	10, 14	KGGGK*GLGK*GGAK	18.0212	1.17651e+07	1.16208e+07	1.69479e+07	1.79067e+07	1.16929e+07	1.74273e+07	0.872941	3.89027	1.49041	0.575708	1.28068	1.49041	2.42953	rat
XP_001054684	LOC679840	PREDICTED: histone H4 replacement-like	10, 14, 18	KGGGK*GLGK*GGAK*R	22.0909	6.4578e+07	4.91598e+07	2.37594e+07	1.66975e+07	5.68689e+07	2.02284e+07	19.1709	24.6858	0.355703	-1.49126	-0.786289	-2.81134	-1.72463	rat
XP_001054684	LOC679840	PREDICTED: histone H4 replacement-like	6, 10, 14	K*GGGK*GLGK*GGAK	25.6106	2.48144e+07	3.2469e+07	2.75343e+07	3.34311e+07	2.86417e+07	3.04827e+07	18.8978	13.6789	1.06428	0.0898721	0.79484	1.06428	1.73488	rat
XP_001054684	LOC679840	PREDICTED: histone H4 replacement-like	6, 10, 14, 18	K*GGGK*GLGK*GGAK*R	28.9221	8.84241e+08	1.11567e+09	3.16883e+08	3.44362e+08	9.99956e+08	3.30622e+08	16.3652	5.87702	0.330637	-1.59668	-0.891713	-3.02447	-1.85538	rat
XP_001054684	LOC679840	PREDICTED: histone H4 replacement-like	6, 14, 18	K*GGGKGLGK*GGAK*R	22.0909	2.62324e+08	3.08696e+08	1.18161e+08	1.26882e+08	2.8551e+08	1.22521e+08	11.4847	5.03303	0.429132	-1.22051	-0.51554	-2.33029	-1.42953	rat
XP_002725309	LOC680097	PREDICTED: histone cluster 1, H2ae-like	479	KTESHHK*PK	1.69463	75709	94303	50612	58508	85006	54560	15.4671	10.2333	0.641837	-0.639721	0.0652467	-1.55803	1.04626	rat
XP_001056658	LOC680322	PREDICTED: histone cluster 1, H2ae-like	126	KTESHHK*VK	0.805175	5376	11089	4972	4098	8232.5	4535	49.0702	13.6276	0.550865	-0.860228	-0.15526	-1.81533	-1.11362	rat
XP_001071565	LOC684681	PREDICTED: histone cluster 1, H1c-like	168	KPAAAAVTK*K	14.7127	1.25618e+06	887319	1.01851e+06	991333	1.07175e+06	1.00492e+06	24.3366	1.91244	0.937645	-0.0928858	0.612082	-1.0665	1.52846	rat
XP_001071565	LOC684681	PREDICTED: histone cluster 1, H1c-like	17	PAAPAAAPPAEK*APAK	35.7648	1.59268e+06	2.05464e+06	1.27352e+06	1.39084e+06	1.82366e+06	1.33218e+06	17.9121	6.22688	0.7305	-0.453045	0.251923	-1.36893	1.19079	rat
XP_001071565	LOC684681	PREDICTED: histone cluster 1, H1c-like	26	AAK*KPAGMR	14.5573	1.56511e+07	1.34492e+07	1.05517e+07	8.11381e+06	1.45502e+07	9.33275e+06	10.701	18.4709	0.641419	-0.64066	0.0643073	-1.55904	1.04558	rat
M0R7B4	H1D	PREDICTED: histone cluster 1, H1d-like	§137	AKKPAGSAK*KPK	2.39577	8374	22508	13247	15376	15441	14311.5	64.7254	10.519	0.926851	-0.109591	0.595376	-1.07892	1.51087	rat
