# Supplementary material for: Proteome-Wide Lysine Acetylation in Cortical Astrocytes and Alterations That Occur during Infection with Brain Parasite Toxoplasma gondii
Source: PLoS One. 2015 Mar 18;10(3):e0117966. doi: 10.1371/journal.pone.0117966 (PMC4364782; doi:10.1371/journal.pone.0117966)
Supplement: S4 Table — (XLSX) [file pone.0117966.s004.xlsx]

## Sheet: Table S4
Table S4: KEGG pathway enrichment
Category	Term	Count	%	PValue	Genes	List Total	Pop Hits	Pop Total	Fold Enrichment	Bonferroni	Benjamini	FDR
KEGG_PATHWAY	rno03010:Ribosome	19	8.52018	8.09577e-14	P20280, P02401, P11250, P61354, P05426, P84100, P62282, P18445, P04646, Q63507, P62914, P62425, P62986, P17078, P62718, P62982, P62856, P62909, P62864	123	83	5590	10.4036	8.90288e-12	8.90288e-12	9.1438e-11
KEGG_PATHWAY	rno00020:Citrate cycle (TCA cycle)	9	4.03587	1.60122e-07	Q6P6R2, P04636, Q99NA5, Q920L2, Q8VHF5, P49432, P56574, P14408, P26284	123	30	5590	13.6341	1.76133e-05	8.80667e-06	0.00018091
KEGG_PATHWAY	rno05016:Huntington's disease	18	8.07175	5.90298e-07	Q9Z2L0, P10719, P35434, B2RYS2, Q4QQW4, P81155, P19511, P29418, P15999, P31399, Q09073, Q920L2, Q6JHU9, Q05962, Q5M9I5, P07895, Q9R1Z0, Q06647	123	190	5590	4.30552	6.49307e-05	2.1644e-05	0.000666932
KEGG_PATHWAY	rno05012:Parkinson's disease	15	6.72646	1.99846e-06	Q9Z2L0, P10719, P35434, B2RYS2, P81155, P19511, P29418, P15999, P31399, Q09073, Q920L2, Q05962, Q5M9I5, Q9R1Z0, Q06647	123	142	5590	4.80076	0.000219807	5.49562e-05	0.00225789
KEGG_PATHWAY	rno00650:Butanoate metabolism	8	3.58744	5.29396e-06	Q9WVK7, Q64428, P97519, P17764, P14604, P49432, P26284, Q5XI22	123	33	5590	11.0175	0.000582168	0.000116461	0.00598109
KEGG_PATHWAY	rno00010:Glycolysis / Gluconeogenesis	11	4.93274	1.19611e-05	P05708, Q6P6R2, P04642, Q6P6V0, P04797, P49432, P48500, P04764, P26284, P05065, P16617	123	84	5590	5.95141	0.00131487	0.000219265	0.0135132
KEGG_PATHWAY	rno00071:Fatty acid metabolism	8	3.58744	2.84048e-05	Q5XIC0, Q9WVK7, P45953, Q64428, P17764, P14604, Q60587, Q5XI22	123	42	5590	8.6566	0.00311969	0.000446267	0.0320877
KEGG_PATHWAY	rno00280:Valine, leucine and isoleucine degradation	8	3.58744	5.2422e-05	Q9WVK7, Q6P6R2, Q64428, P97519, P17764, P14604, Q60587, Q5XI22	123	46	5590	7.90385	0.00574997	0.000720561	0.0592117
KEGG_PATHWAY	rno00620:Pyruvate metabolism	7	3.13901	0.000172863	Q6P6R2, P04636, P04642, P17764, P49432, P26284, Q5XI22	123	39	5590	8.15718	0.0188369	0.00211072	0.195131
KEGG_PATHWAY	rno00062:Fatty acid elongation in mitochondria	4	1.79372	0.000524337	Q9WVK7, Q64428, P14604, Q60587	123	8	5590	22.7236	0.0560595	0.00575261	0.590812
KEGG_PATHWAY	rno00190:Oxidative phosphorylation	11	4.93274	0.000749936	P19511, P15999, P29418, P31399, Q76MV3, P10719, P35434, B2RYS2, Q920L2, Q5M9I5, Q06647	123	137	5590	3.64904	0.0792105	0.0074741	0.844032
KEGG_PATHWAY	rno05010:Alzheimer's disease	12	5.38117	0.00361189	P19511, P15999, P29418, P31399, P10719, P35434, P62161, B2RYS2, Q920L2, P04797, Q5M9I5, Q06647	123	197	5590	2.76835	0.328357	0.0326249	4.00576
KEGG_PATHWAY	rno03040:Spliceosome	9	4.03587	0.0047027	P63018, Q6URK4, P04256, P14659, Q6AYI1, Q4V898, Q6IMY8, Q62826, P61980	123	121	5590	3.38037	0.404597	0.0391009	5.18642
KEGG_PATHWAY	rno00640:Propanoate metabolism	5	2.24215	0.00541722	Q64428, P04642, P17764, P14604, Q5XI22	123	33	5590	6.88593	0.449822	0.0417816	5.95262
KEGG_PATHWAY	rno00330:Arginine and proline metabolism	6	2.69058	0.0056697	P07335, P50442, P0C2X9, P00507, P54001, P10860	123	53	5590	5.14496	0.464975	0.0408388	6.22201
KEGG_PATHWAY	rno00310:Lysine degradation	5	2.24215	0.0117302	Q9WVK7, Q64428, P17764, P14604, Q5XI22	123	41	5590	5.54234	0.726909	0.0779188	12.481
KEGG_PATHWAY	rno05322:Systemic lupus erythematosus	7	3.13901	0.0133891	P38656, Q6LED0, P84245, Q00729, P0C0S7, P62804, P01026	123	90	5590	3.53478	0.772987	0.083525	14.1265
KEGG_PATHWAY	rno00380:Tryptophan metabolism	5	2.24215	0.0138268	Q9WVK7, Q64428, P17764, P14604, Q5XI22	123	43	5590	5.28455	0.783803	0.0815675	14.556
KEGG_PATHWAY	rno00072:Synthesis and degradation of ketone bodies	3	1.34529	0.0153847	P97519, P17764, Q5XI22	123	9	5590	15.1491	0.818313	0.0858508	16.0687
KEGG_PATHWAY	rno00250:Alanine, aspartate and glutamate metabolism	4	1.79372	0.0268189	P35433, P0C2X9, P00507, P10860	123	30	5590	6.05962	0.949731	0.138877	26.4456
KEGG_PATHWAY	rno04114:Oocyte meiosis	7	3.13901	0.0337517	P21932, P40146, P62161, P35213, P97690, P62260, P08413	123	111	5590	2.86604	0.977104	0.164602	32.1532
KEGG_PATHWAY	rno04020:Calcium signaling pathway	9	4.03587	0.0446945	P81155, P21932, P40146, Q9Z2L0, P62161, Q09073, Q05962, Q9R1Z0, P08413	123	182	5590	2.24739	0.993459	0.204369	40.3456
KEGG_PATHWAY	rno00030:Pentose phosphate pathway	3	1.34529	0.0955092	Q6P6V0, Q9EQS0, P05065	123	24	5590	5.68089	0.999984	0.381274	67.8306
